# Supplementary material
Source: publisher figshare collection journal article supplement (https://frontiersin.figshare.com/ndownloader/files/24779171)
Supplement: Supplementary file [file 24779171]

### Supplementary Figure

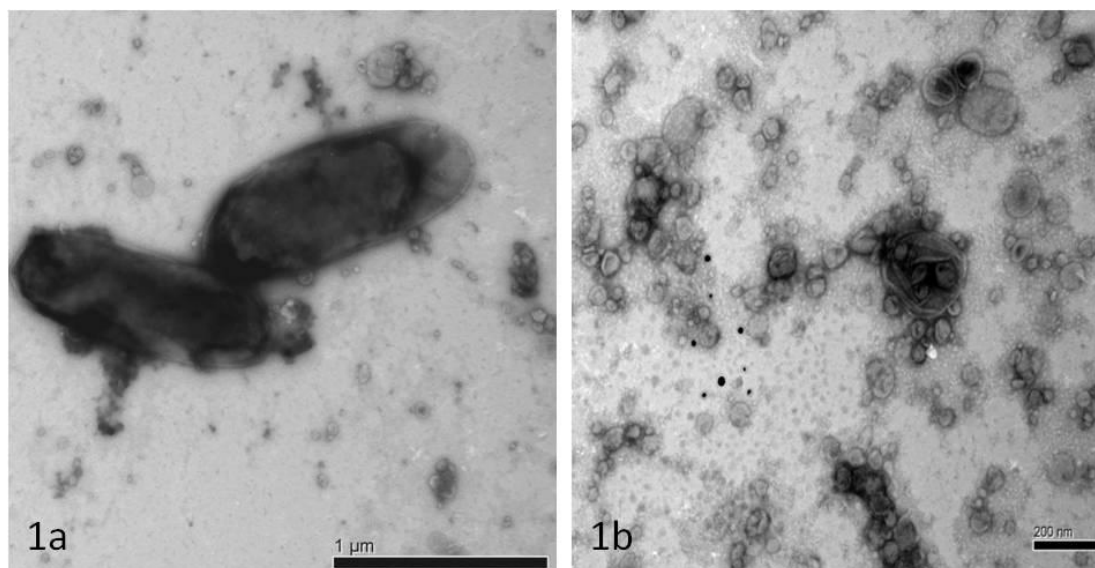

**Figure S1.** Transmission electron microscopy images: (1a) outer membrane vesicles (OMVs) with *Av. paragallinarum*, bar indicates 1 μm; (1b) purified OMVs, bar indicates 0.2 μm.
